# Supplementary material for: Assessing Non-Ideal Instrumental Effects in High-Resolution FTIR Spectroscopy: Instrument Performance Characterization
Source: Copernicus journal article supplement (doi:10.5194/egusphere-2025-2232), 2025-06-03
Supplement: Supplementary file [file egusphere-2025-2232-AC1-supplement.pdf]

## Response to Referee #2

We sincerely thank the referee for their careful reading of our manuscript and for their constructive comments and suggestions. Their feedback has been very helpful in improving the clarity and quality of the paper. Below, we provide a point-by-point response to each comment, with the referee’s remarks reproduced for clarity followed by our replies.

---

### Major comments and questions

#### R.C. 1.1: Systematic residuals and wavenumber calibration

There is a systematic “s-shaped” pattern in the residuals, which typically appears when the calculated and measured spectra are shifted relative to each other, suggesting that the wavenumber calibration might be slightly off. The amplitude of this s-shaped residual pattern also changes over the years, indicating that the misalignment drifts with time. The manuscript does not mention how such potential misalignments are handled, and the presence of s-shaped residuals is a red flag. There is also a concern that the use of fitting parameters such as HBr partial pressure, total pressure, and effective temperature could empirically reduce residuals resulting from misalignment without necessarily improving the accuracy of the ILS determined with LINEFIT.

#### A.C.:

We thank the referee for drawing attention to the systematic “s-shaped” structures in the residuals. We agree that this pattern is a classical indicator of a small but systematic mismatch between the measured and calculated wavenumber grids, and that such a mismatch—if not corrected explicitly—can propagate into the ILS inversion and compromise the physical validity of the retrieved parameters. We appreciate this comment, as it helped us identify and correct an implicit assumption in the previous workflow. In the revised manuscript, we now explicitly describe and implement a rigorous wavenumber-calibration procedure, applied before LINEFIT is invoked, which resolves the underlying cause of the pattern and eliminates the possibility that gas-cell parameters absorb misalignment errors.

- a) How are potential misalignments between measured and calculated spectra handled in the analysis?

#### A.C.:

We thank the referee for raising this important issue. In the previous version of the manuscript, the instrument was implicitly treated as if it possessed an identical sampling grid and wavenumber scale across all measurement years; as the referee correctly notes, this assumption is not valid. The major maintenance intervention in 2011 increased the maximum OPD and changed the effective spectral resolution from 0.009 to 0.00775  $\text{cm}^{-1}$ , and our subsequent investigation also revealed a slight adjustment in the internal He–Ne reference-laser wavenumber (from 15798.088  $\text{cm}^{-1}$  before maintenance to 15798.0604  $\text{cm}^{-1}$  afterward). These changes imply that neither the sampling grid nor the spectral scaling can be assumed constant over time. We fully agree that such variations can lead to residual misalignments—whether originating from laser drift, sampling inconsistencies,

or OPD-dependent asymmetries—which must be explicitly corrected before any ILS retrieval is attempted. Accordingly, in the revised analysis, all steps that could influence the relative alignment between measured and calculated spectra were completed before initiating any LINEFIT inversion, and no empirical shift parameters were fitted during the retrieval. Instead, all spectra were (i) reconstructed from the raw interferograms at a uniform spectral resolution of  $0.01\text{ cm}^{-1}$ , (ii) converted to transmittance using only reprocessed background and sample spectra, (iii) corrected for laser-frequency differences via wavenumber-scale stretching, (iv) resampled onto a common wavenumber grid using the OPUS “Make Compatible” procedure, (v) homogenized in effective resolution by clipping all interferograms to a maximum OPD of 100 cm, and (vi) processed with a uniform zero-fill factor of four to ensure consistent sampling density across all years. Together, these revisions ensure that the measured and calculated spectra are fully aligned prior to inversion and that the retrieved ILS is not influenced by uncorrected spectral misalignment.

- b) Are misalignments corrected before or during the least-squares fitting with LINEFIT?

**A.C.:**

All misalignments are corrected before initiating the least-squares fitting in LINEFIT. In the revised workflow, the spectra supplied to LINEFIT have already undergone the full external wavenumber-calibration procedure described in our response to R.C. 2.1(a). This includes reprocessing the interferograms with consistent FFT settings, applying the laser-based stretching correction, performing a constant-offset alignment to HITRAN line positions, and resampling the spectra onto a single harmonized wavenumber grid. As a result, LINEFIT receives inputs that are already spectrally aligned at high precision, and it is not required to compensate for any residual wavenumber-scale discrepancies.

- c) Is a wavenumber shift applied to the calculated or measured spectrum to bring them into alignment?

**A.C.:**

A constant wavenumber shift is not imposed on the calculated spectrum, and only a minimal, physically justified correction is applied to the measured spectra. The misalignment between pre-2011 and post-2011 data does not originate from a simple additive offset, but from a change in the sampling-grid spacing caused by the modification of the internal He–Ne reference-laser wavenumber after the 2011 maintenance intervention. Because the reference laser defines the interferogram sampling interval, the shift from  $15798.088\text{ cm}^{-1}$  to  $15798.0604\text{ cm}^{-1}$  introduces a genuine multiplicative scaling error in the wavenumber axis, which cannot be corrected by applying a uniform shift to either the measured or calculated spectrum. To resolve this rigorously, we harmonized the wavenumber grids prior to any LINEFIT inversion using the OPUS *Make Compatible* function, designating the pre-2011 spectra as the Principal File and resampling all post-2011 spectra onto this physically consistent grid using the *Reduce Resolution* method. This ensures that the measured spectra entering LINEFIT already reside on a common wavenumber axis, leaving LINEFIT to apply only the small, physically appropriate fine-alignment shift relative to HITRAN. This approach eliminates the structural grid mismatch at its source and prevents any compensation of misalignment errors through gas-cell or baseline parameters during the ILS retrieval.

In addition, within LINEFIT we applied a zero-filling factor of  $\times 4$  to increase the effective sampling density of the interferogram and to improve the precision of spectral-feature interpolation. A further contributor to the earlier s-shaped residuals was that the original version of the manuscript did not treat the HBr isotopes separately in the LINEFIT configuration. In the revised analysis, we explicitly include the two abundant isotopes ( $\text{H}^{79}\text{Br}$  and  $\text{H}^{81}\text{Br}$ ), which substantially improves the accuracy of the forward model near the HBr lines. Finally, to ensure a physically consistent comparison across years, we configured LINEFIT such that the maximum OPD in the post-2011 datasets—whose raw interferograms exceeded 100 cm—was clipped to 100 cm, matching the pre-2011 effective OPD. The combination of isotopic treatment, zero-filling, and OPD harmonization significantly reduced and, in many cases, eliminated the s-shaped residual structures.

- d) Is there a stretching applied to the wavenumber scale of the measurement, which would be more physically rigorous than using a shift?

**A.C.:**

Although LINEFIT performs an internal wavenumber calibration by comparing the measured spectra with HITRAN line positions, the previous version of the manuscript exhibited a persistent wavenumber displacement. This arose from the implicit assumption that the Bruker 120M operated with a constant He–Ne reference-laser wavenumber throughout the full measurement period. Upon reviewing the historical instrument configuration, we confirmed that this assumption was incorrect: the reference laser changed from  $15798.088\text{ cm}^{-1}$  before the 2011 maintenance intervention to  $15798.0604\text{ cm}^{-1}$  afterwards. Because the reference laser defines the interferogram sampling interval, this change introduces a subtle but systematic *multiplicative scaling discrepancy* in the spectral sampling grid, manifesting as a global compression or expansion of the measured spectrum.

To correct this effect rigorously, we now perform an *external wavenumber-scale calibration* in OPUS. The pre-2011 spectra are taken as the reference state, and the post-2011 spectra are rescaled using the physically justified stretching factor:

$$\text{Stretching factor} = \frac{15798.088}{15798.0604} \approx 1.00000175,$$

Applying this stretching factor in OPUS harmonizes the wavenumber spacing across all years and removes the systematic distortions that would otherwise produce pronounced S-shaped residuals during the ILS fitting.

- e) There is a danger that “fudge factors” in the analysis (fitting for HBr partial pressure, total pressure in the cell, and effective temperature in the cell) could empirically reduce the residuals resulting from a misalignment without necessarily improving the quality of the analysis result (e.g., the accuracy of the ILS determined with LINEFIT).

**A.C.:**

We thank the referee for raising this important point. We fully agree that, in principle, fitting cell parameters could mask instrumental misalignment if they were allowed to absorb line-shape discrepancies. In our analysis, however, the thermodynamic cell parameters are *fitted first while*

all instrumental artifacts are held strictly fixed at their nominal values, and only after their convergence does LINEFIT retrieve the ILS. This procedure guarantees a structural decoupling: temperature and pressure affect only absolute line intensities and broadening, whereas misalignment uniquely modifies the *line shape* through modulation efficiency loss, phase error, and asymmetry. Consequently, the cell parameters cannot mimic or remove the characteristic distortions produced by shear or tilt. Consistent with this separation, improvements in the residuals always coincide with physically meaningful improvements in ME, PE, FWHM, and ILS symmetry, and these changes are independently corroborated by ALIGN60 simulations. Moreover, the retrieved cell parameters remain physically realistic—temperatures within  $< 2$  K of room temperature and pressures within  $< 0.1$  mbar of the NDACC reference value ( $\sim 1.5$  mbar)—fully consistent with the known slow leakage of NDACC HBr cells. Crucially, no anomalous drifts or non-physical fluctuations are observed; such behaviour would be expected if the cell parameters were compensating for misalignment. Thus, the reduction in residuals reflects genuine correction of the underlying misalignment rather than numerical absorption of errors by the cell-state parameters.

### A.C.:

In conclusion, we implemented a complete and physically consistent wavenumber-calibration and pre-LINEFIT alignment procedure that eliminates the structural grid mismatch responsible for the pronounced S-shaped residuals in the earlier analysis. The example figure clearly demonstrates this improvement: the strong S-pattern previously present is now markedly reduced, and this systematic suppression of misalignment-induced residual structure is observed consistently across all measurement years in the revised manuscript.

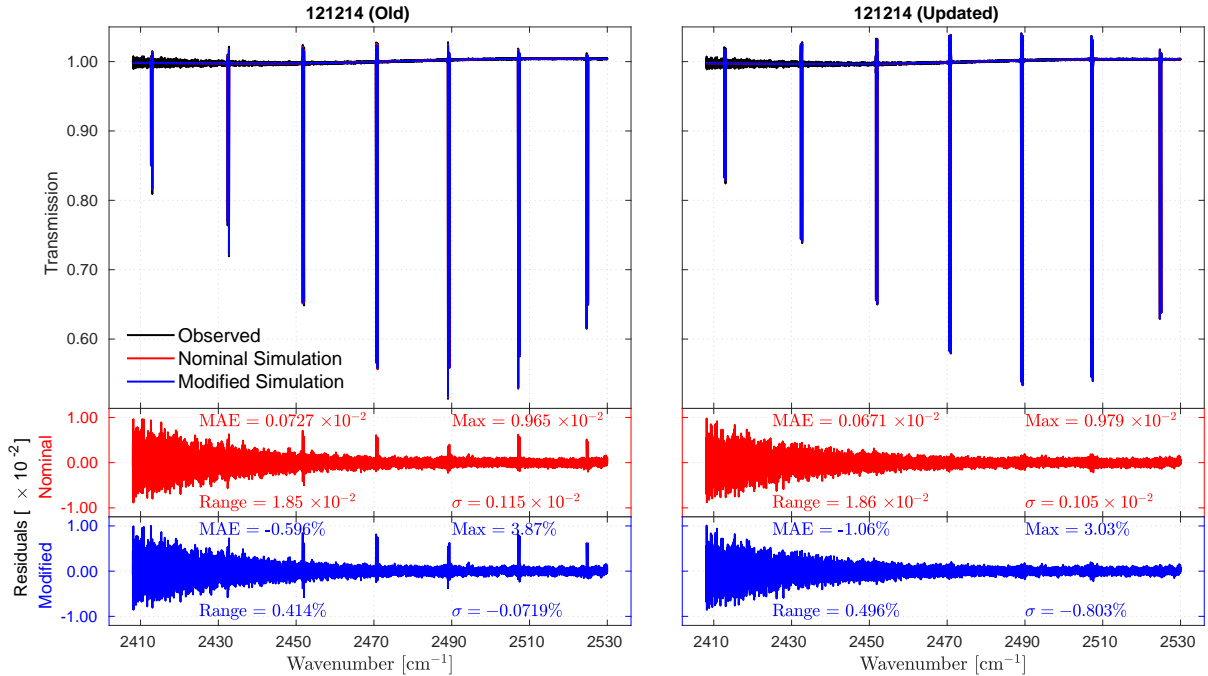

Figure 1: Comparison of observed, nominal, and modified HBr transmission spectra with residual analysis across different dates.

### **R.C. 1.2: Line-shape model**

The situation becomes more complex if non-Voigt effects such as speed dependence or line mixing contribute to the HBr line shape, since in that case the systematic residuals may not disappear completely unless the correct non-Voigt parameters are used. However, if such effects are significant, this should already be a known issue, as HBr is routinely employed as a calibration standard for NDACC instruments. Are non-Voigt effects, including speed dependence or line mixing, considered in the analysis, and if not, could their omission explain the persistence of systematic residuals?

**A.C.:**

We thank the referee for raising this point. For the HBr cell used here (1.5 mbar, 2 cm), the lines are strongly Doppler-dominated, and non-Voigt mechanisms such as speed-dependent broadening or line mixing are known to be negligible. This is consistent with NDACC-IRWG recommendations and with the standard LINEFIT implementation, which assumes Voigt line shapes for HBr cell analysis. Previous NDACC studies have shown that non-Voigt effects for HBr under these conditions do not noticeably alter the residual structure or affect retrieved ILS parameters.

Therefore, while we acknowledge that incorporating non-Voigt mechanisms is theoretically possible, their magnitude at the pressures used here is far below the level required to explain the observed s-shaped residuals. These residuals arise instead from wavenumber misalignment/stretching, as addressed in our revised analysis.

### **R.C. 1.3: Choice of HBr Line**

The selected HBr line P(6) lies in a region where the signal-to-noise ratio is considerably lower than that of other HBr lines measured. The choice of this line for Figure 14 appears to be made to avoid other lines where the noise is lower and where systematic features in the residuals would be more visible. It is suggested to instead use a line with less noise, such as the one where the systematic feature in the residuals is circled in the figure, since systematic features in the residuals reveal potential issues in the ILS determination if their origin cannot be explained. What is the reason for selecting the P(6) line despite its lower signal-to-noise ratio, and how is the choice justified when clearer residual features could provide more diagnostic insight into the ILS determination?

**A.C.:**

We sincerely thank the referee for raising this important point. In the earlier version of the manuscript, we illustrated the residual behavior using the P(6) line of HBr. As the referee correctly noted, this microwindow exhibits a comparatively lower signal-to-noise ratio, and its elevated noise level can partially mask systematic structures in the residuals—precisely the features that are most informative for diagnosing ILS distortions. We fully agree that this choice was not optimal for clearly visualizing such effects. In response to the referee's valuable suggestion, we have replaced the P(6) line with the higher-SNR P(2) transition of H<sup>81</sup>Br (2506.90–2507.30 cm<sup>-1</sup>). This transition is widely used for ILS characterization within the NDACC community (e.g. Makarova et al., 2016) and corresponds exactly to the line highlighted by the referee as exhibiting clearer systematic signatures. The updated analysis confirms this improvement: for example, in the 161021 dataset, the nominal configuration exhibits a

clear, structured residual pattern. When the modified configuration is applied, the residual structure is substantially reduced, with improvements exceeding 18% in the corresponding metrics. Similar improvement levels are observed across most other years. Thus, the revised microwindow selection enhances not only the visibility of systematic effects but also the stability and interpretability of the nominal–modified comparison. To ensure consistency across the manuscript, the updated residual plots are now presented in the same absolute transmission units as in Figure 13, rather than the relative (percentage) scaling used previously for P(6). This revision improves comparability across figures and directly addresses the referee’s concern regarding interpretability.

#### R.C. 1.4: Clarity of Definitions and Configurations

The referee noted that in Figure 3 the terms “*theoretically ideal*” and “*nominally ideal*” are not explicitly defined, forcing the reader to infer their meaning—assuming the latter differs from the former only by self-apodization from off-axis rays (finite field-of-view effect). In Section 3.8, the *nominal configuration* is described as representing ideal conditions, yet line 393 shows it was implemented in the LINEFIT ILS retrieval (zero offsets, no wavenumber shifts, and no channeling), suggesting it may still rely on a LINEFIT-derived ILS that could include non-ideal effects. The manuscript also mentions a *misaligned setup* in Section 3.8 and a *modified configuration* in the following section, which the referee suspects might be the same, while line 456 introduces *measured conditions* that appear equivalent to the nominal setup, creating ambiguity and inconsistency in terminology across sections. The questions implied by the comment are:

- (a) Does the “nominal configuration” use the ILS derived from LINEFIT?
- (b) Are the “misaligned setup” and “modified configuration” referring to the same configuration under different names?
- (c) Why does line 456 refer to “measured conditions” instead of “nominal” if they represent the same configuration? What is the reason for using different labels?

#### A.C.:

We thank the referee for this thoughtful comment and for pointing out the ambiguity in the terminology surrounding the instrument configurations. We agree that the definitions of “theoretically ideal”, “nominally ideal”, “nominal configuration”, “measured conditions”, and “modified configuration” were not consistently or explicitly differentiated in the original manuscript, which may hinder a clear understanding of the methodological framework. We have now revised the manuscript to remove this ambiguity and ensure consistency throughout.

##### 1. “Theoretically ideal” (Figure 3)

We now explicitly define theoretically ideal as a conceptual reference interferogram derived from the analytic expression of the ideal interferometer (no self-apodization, no wavenumber dependence in the optical response, perfect modulation efficiency = 1, and zero phase error). This curve is derived from the ideal interferogram model presented in Section 2.1 and is not based on measurements.

##### 2. “Nominally ideal” (Figure 3)

We clarify that nominally ideal refers to a realistic-but-still-idealized case that includes only self-apodization due to the finite field-of-view. That is, it represents the instrument performance expected from an interferometer that is perfectly aligned but illuminated by a divergent source (the Sun) with the measured field-stop radius. It does not include misalignment, channeling, or any measured non-idealities. Thus, we have revised the caption of Figure 3 and the associated text to reflect this explicitly.

### 3. Clarification of the “nominal configuration” used in LINEFIT

In the nominal configuration, all baseline polynomial coefficients were initialized to unity, enforcing a perfectly flat baseline with no imposed distortions. The spectral-abscissa parameters were fixed at their ideal values so that no correction to the spectral axis is applied. Spectral channeling was disabled by setting the number of channeling frequencies to zero. Self-apodization associated with the finite field of view was retained, as it is an unavoidable physical characteristic even for a perfectly aligned instrument. ME was set to unity at ZPD and allowed to vary with OPD only through the position-dependent regularization of the extended parameter model, and PE was initialized at zero and treated in the same manner. Thus, in this configuration, the ILS deduced by LINEFIT with all fitting parameters held at their ideal values, while including only the physically required self-apodization, is taken as the nominal ILS.

### 4. Consistency between “misaligned setup” and “modified configuration”

We agree that the previous wording could cause confusion. The “misaligned setup” and “modified configuration” refer to the same concept: the full LINEFIT-retrieved ILS including misalignment, channeling, offsets, and wavenumber distortions. To avoid ambiguity, we now use only “modified configuration” throughout the manuscript.

### 5. Clarifying “measured conditions” versus “nominal conditions”

We thank the referee for pointing out this inconsistency. The term “*measured conditions*” in the original manuscript was unintended and referred to the same configuration that we elsewhere (and more consistently) call the *nominal configuration*. No separate “measured” configuration exists in our analysis. The phrase appeared only because the nominal configuration uses the forward-model ILS corresponding to ideal parameter values applied to the measured HBr spectra, and this wording inadvertently suggested a distinct category. To avoid confusion, we have removed the term “measured conditions” entirely from the manuscript and replaced it with the consistent term *nominal configuration* in all locations, including the percentage-difference formula in Section 4. The revised text now states unambiguously that the denominator  $M_{\text{nominal}}$  refers to the nominal configuration. We appreciate the referee’s observation, which has improved the clarity and consistency of the manuscript.

## R.C. 1.5: Superfluous theoretical content

Some of the introductory material seems superfluous in that it does not directly relate to quantities being measured in the study. For example, formalizing separating the contributions from different sources on modulation efficiency and phase error in Section 2.6 plays no role in the analysis. Similarly, Section 2.5 derives an equation for the tolerance to lateral shifts, but that equation is

never used in the analysis. The material would be appropriate in other forums (like a book delving into non-ideal aspects of an FTS), but it seemed like some of the theory could be trimmed without losing any necessary information for understanding the article.

**A.C.:**

Sections 2.5 and 2.6 were remnants from an earlier stage of the work, when we had planned to explicitly model the lateral shear of the instrument. Since this approach was not ultimately used in the final analysis, these sections no longer served a direct purpose. We apologize for the confusion, and in the revised manuscript we have removed them.

### **R.C. 1.6: Interpretation of performance degradation**

The figures in Figs. 8–11 are said to illustrate the progressive degradation of the FTIR instrument's performance over time; however, some care is needed since the maximum optical path difference (MOPD) was increased in 2011, effectively making it a different instrument. This change is evident from the narrowing of the FWHM of the ILS between 2011 and 2012 (Table 4), which is an expected consequence of increasing MOPD. The modification also altered the sampling, as shown for the P(6) line in Figure 14, where in 2011 the line peak lies roughly halfway between two sampled points, while in 2012 the sampling occurs near the peak. The interferogram ZPD peak intensity shows a large boost in 2012, likely due to freshly cleaned optics and optimal alignment, followed by a definite drop in 2013. It is therefore not fair to compare 2013 with 2011 and conclude degradation, since these represent two distinct instrument configurations. By 2013 the system had settled into a dirty-optic, not-perfectly-aligned state and could not be expected to match 2011 characteristics if different optics and possibly a different input aperture were used. It is common practice to match the input aperture to the resolution to avoid excessive self-apodization losses in modulation efficiency at large MOPD, and a smaller aperture for higher resolution would naturally yield a smaller ZPD intensity if less light entered the instrument. Interestingly, the ZPD peak intensity increases again between 2013 and 2016, which appears inconsistent with the suggestion of progressive degradation when the large drop between 2012 and 2013 is disregarded.

**A.C.:**

We appreciate the referee's detailed observation regarding the configuration change in 2011. Indeed, in that year the Addis Ababa Bruker FTS-120M underwent a substantial hardware upgrade that increased the maximum OPD and thereby the achievable spectral resolution, while the acquisition parameters and the input aperture remained unchanged. As correctly noted, this modification unavoidably altered the discrete sampling of both the interferogram and the HBr line positions, which makes any direct comparison of raw ZPD amplitudes between the pre-2011 and post-2011 measurements inappropriate. In light of this, the revised manuscript explicitly avoids interpreting differences between 2011 and later years as evidence of progressive degradation. To ensure that sampling effects do not bias the ZPD intensity analysis, we now harmonize the sampling grid across all years by adopting the pre-2011 OPD sampling as a reference and applying Fourier-domain interpolation (4x oversampling) to all interferograms before extracting peak amplitudes. This procedure removes sampling-location dependencies and ensures that variations in ZPD peak height reflect only changes in optical throughput and alignment, rather than differences in sampling geometry. We agree that the 2011 and 2013 measurements cannot



be directly contrasted to infer degradation, since they represent different instrument configurations, and the manuscript has been revised accordingly to avoid that implication.

### **R.C. 1.7: Atmospheric retrieval comparison request**

The paper repeatedly emphasizes that accurate modeling of the non-ideal characteristics of an FTS will improve atmospheric measurements. Therefore, it would be appropriate to include a comparison of atmospheric measurements obtained from the instrument using the nominal and modified configurations. There is no need to demonstrate that the results are better, only that they are different and to show how these differences compare to the associated uncertainties. However, the referee noted some hesitation in insisting on the inclusion of the atmospheric results, as this addition may further increase the length of an already extensive paper. The referee suggested that this could be balanced by reducing some of the less essential discussion in the introduction.

### **A.C.:**

We sincerely thank the reviewer for this thoughtful recommendation. We fully agree that the primary motivation for accurately modeling non-ideal instrumental effects is to improve atmospheric trace gas retrievals, and that illustrating the impact on real atmospheric measurements is a logical continuation of the present work. However, we would like to clarify that a dedicated companion paper focusing exclusively on atmospheric retrievals—“Non-Ideal Instrumental Impacts on the Abundance and Uncertainty of CO, C<sub>2</sub>H<sub>6</sub>, HCN, and C<sub>2</sub>H<sub>2</sub> Retrieved from High-Resolution Ground-based FTIR”—has already been submitted and received a comment to make adjustment in the result section. This second manuscript builds directly on the instrumental characterization presented here and contains a comprehensive analysis of column abundances, vertical profiles, uncertainty budgets, vertical resolution, and averaging kernel behaviour under nominal and modified configurations for the Addis Ababa FTIR dataset (2009–2017). The atmospheric results are therefore not omitted; rather, they are treated in depth in a separate paper to keep each manuscript focused, readable, and within a manageable length. Incorporating the full retrieval analysis into the present paper would significantly increase its size (the companion paper is itself substantial) and would obscure the core objective of this manuscript, which is to rigorously diagnose, quantify, and correct non-ideal instrumental effects using HBr cell measurements, ALIGN60 simulations, and LINEFIT retrievals. We emphasize that the two manuscripts are intentionally complementary:

- **The present paper** provides a detailed characterization of instrumental non-idealities (modulation efficiency degradation, phase error, spectral channeling, baseline offsets, and misalignment) and demonstrates how these are corrected.
- **The companion paper** evaluates how these corrections propagate into atmospheric gas retrievals (CO, C<sub>2</sub>H<sub>6</sub>, HCN, C<sub>2</sub>H<sub>2</sub>), including differences between nominal and modified configurations relative to retrieval uncertainty.

To address the referee’s concern, we have revised the introduction of the current manuscript to explicitly state that the comparison of atmospheric retrievals using nominal and modified configurations is fully presented and discussed in the companion study.

## Minor issues and typos:

1. Line 237: Perispectives – typo.

**A.C.:**

Corrected to Perspectives

2. Figure 6 caption: Data acquired on 121214

At this point, prior to Table 2, the date format has yet to be defined. The simplest solution would be to write out the date (December 14th, 2012).

**A.C.:**

Corrected to December 14<sup>th</sup>, 2012

3. Line 321: drived

**A.C.:**

Corrected to derived – typo

4. Line 331: Moreove – typo

**A.C.:**

Corrected to Moreover

5. Line 353: the HITRAN database

Not everyone is guaranteed to be familiar with HITRAN. Perhaps a reference (and maybe a definition for the acronym)?

**A.C.:**

Corrected to HITRAN (high-resolution transmission molecular absorption) database (Gordon et al., 2022), which provides reference line parameters for atmospheric gases.

6. Line 440:

As discussed for the interferogram ZPD peak heights previously, sampling could also play a role here for determining the asymmetry parameter. Are you interpolating onto a fine wavenumber grid before determining the sidelobe heights?

**A.C.:**

In the earlier manuscript version, no interpolation was applied. In the revised version, we now perform Fourier interpolation onto a finer wavenumber grid prior to determining the sidelobe heights to minimize sampling effects. Accordingly, the asymmetry values for both configurations reported in Table 4 have been updated.

7. Line 469: with the 3rd maximum showing the greatest reduction

Again the question of whether sampling is taken into account.

**A.C.:**

Yes, this has now been addressed. In the revised analysis, the interferograms are Fourier-interpolated onto a finer OPD grid before extracting the amplitudes of the successive maxima, ensuring that sampling effects are properly accounted for.

8. Line 478: the residual MAE improves from  $0.0849 \times 10^{-2}$  to -5.9211%

I cannot interpret this statement as provided. The mean absolute error should by definition be positive, so it makes no sense to say that it “improves to -5.9%.” I assume you are trying to say that MAE decreases by 5.9% for the modified configuration compared to the nominal configuration. That is not how the text reads. All the comparisons in this paragraph have a number compared to a percent value, rather than saying the stated number (obtained when using the nominal ILS) changes by the stated percentage when using the modified ILS. Note that using 5 significant digits in the percentages implies that the precision in the residuals is good to 5 significant digits, meaning your signal-to-noise ratio should be better than 10000:1 (since the noise level limits the measurement precision). Looking at Figure 13, that is not the case. In my opinion, you should round the reported percentage change to a precision more in keeping with the signal-to-noise levels for the measurement.

**A.C.:**

In the revised manuscript, the residual MAE for 150317 has been updated to  $0.0795 \times 10^{-2}$ . We now explicitly state that the MAE decreases by 5.92% relative to the nominal configuration, rounded to three significant figures to reflect the signal-to-noise limitations of the measurement. The text has been rewritten to avoid any negative percentages and to ensure that absolute values and percentage changes are reported consistently and unambiguously.

9. Figure 18: doesn’t indicate which curve represents the nominal configuration results and which curve represents the modified configuration.

**A.C.:**

Thank you for the observation. The figure has been updated to clearly distinguish the two configurations. A legend has now been included, where the red curve represents the nominal configuration and the blue curve represents the modified configuration.

10. Figure 19, bottom panel y-axis label: deference – typo

**A.C.:**

Corrected to Difference

## References

Iouli E Gordon, Laurence S Rothman, et al. RJ Hargreaves, R Hashemi, Ekaterina Vladimirovna Karlovets, FM Skinner, Eamon K Conway, Christian Hill, Roman V Kochanov, Y Tan, et al. The hitran2020 molecular spectroscopic database. *Journal of quantitative spectroscopy and radiative transfer*, 277:107949, 2022.

MV Makarova, AV Poberovskii, F Hase, Yu M Timofeyev, and Kh Kh Imhasin. Determination of the characteristics of ground-based ir spectral instrumentation for environmental monitoring of the atmosphere. *Journal of Applied Spectroscopy*, 83(3):429–436, 2016.
